# Supplementary material
Source: publisher site journal article supplement (https://www.spandidos-publications.com/5035/downloadSupplementary)
Supplement: Supplementary file 1 [file downloadSupplementary]

Table SI. Quantitative comparison of bystander effects of prodrug-activating suicide gene therapies on HSC-3 cells in the present study and CAL-27 cells from a previous report .

| Cell-prodrug pair    | Prodrug concentration | b-value | % of area |
|----------------------|-----------------------|---------|-----------|
| HSC-3 cells CD/5-FC  | 100 $\mu$ M           | 4.14    | 31.4%     |
| HSC-3 cells TK/GCV   | 25 $\mu$ M            | 1.51    | 13.2%     |
| CAL-27 cells CD/5-FC | 50 $\mu$ M            | 14.0    | 63.2%     |
| CAL-27 cells TK/GCV  | 0.39 $\mu$ M          | 5.85    | 52.3%     |

CD, cytosine deaminase; 5-FC, 5-fluorocytosine; TK, thymidine kinase; GCV, ganciclovir.
